# Supplementary material for: Evaluation of ORCHIDEE-MICT-simulated soil moisture over China and impacts of different atmospheric forcing data
Source: Copernicus journal article supplement (doi:10.5194/hess-22-5463-2018), 2018-10-24
Supplement: Supplementary file [file hess-22-5463-2018-supplement-title-page.pdf › hess-22-5463-2018-supplement-title-page.pdf]

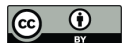

## *Supplement of*

# **Evaluation of ORCHIDEE-MICT-simulated soil moisture over China and impacts of different atmospheric forcing data**

**Z. Yin et al.**

*Correspondence to:* Zun Yin ([vyin@lsce.ipsl.fr](mailto:vyin@lsce.ipsl.fr))

- `hess-22-5463-2018-supplement-title-page.pdf`
- `SUP_ZY_final.pdf`
- `__MACOSX`
  - `._SUP_ZY_final.pdf`

The copyright of individual parts of the supplement might differ from the CC BY 4.0 License.
